# Supplementary material
Source: PubMed Central journal article supplement (PMC5659841)

**A****FFPE vs. Frozen Variants (Jaccard Similarity) FFPE Age**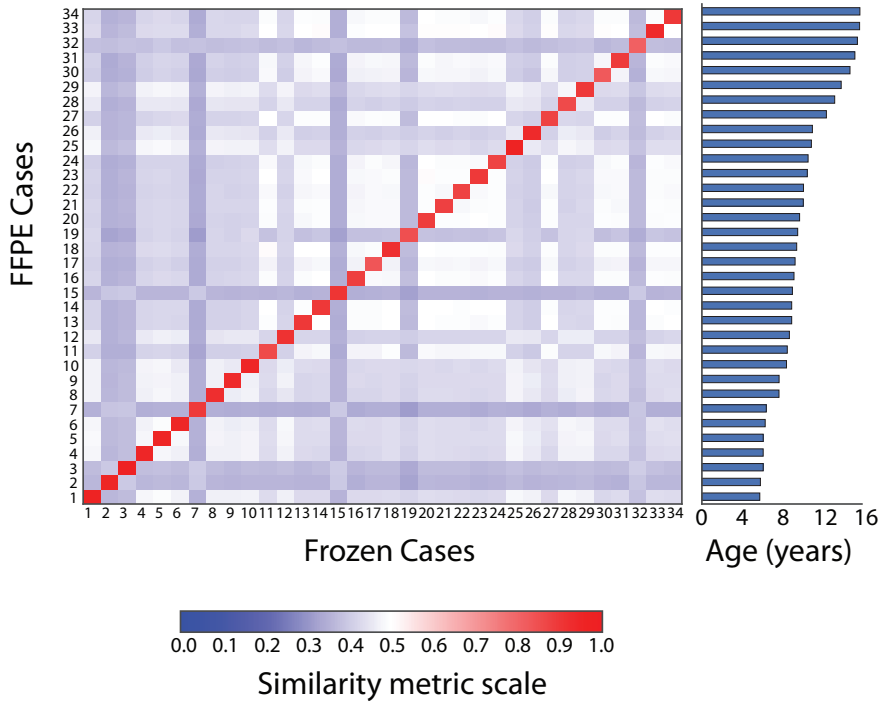**B****Mutation rate distribution**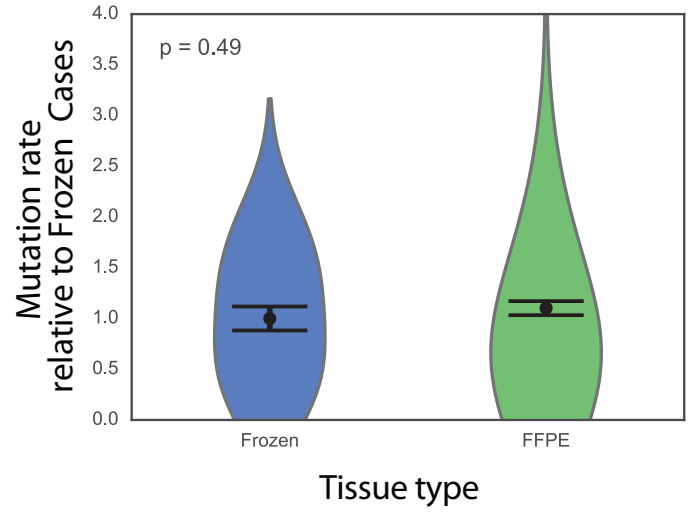

Supplement: NIHMS907791-supplement-1.pdf [file NIHMS907791-supplement-1.pdf]

**A** Paired tumor/normal (N=400)

Unpaired tumors (N=601)

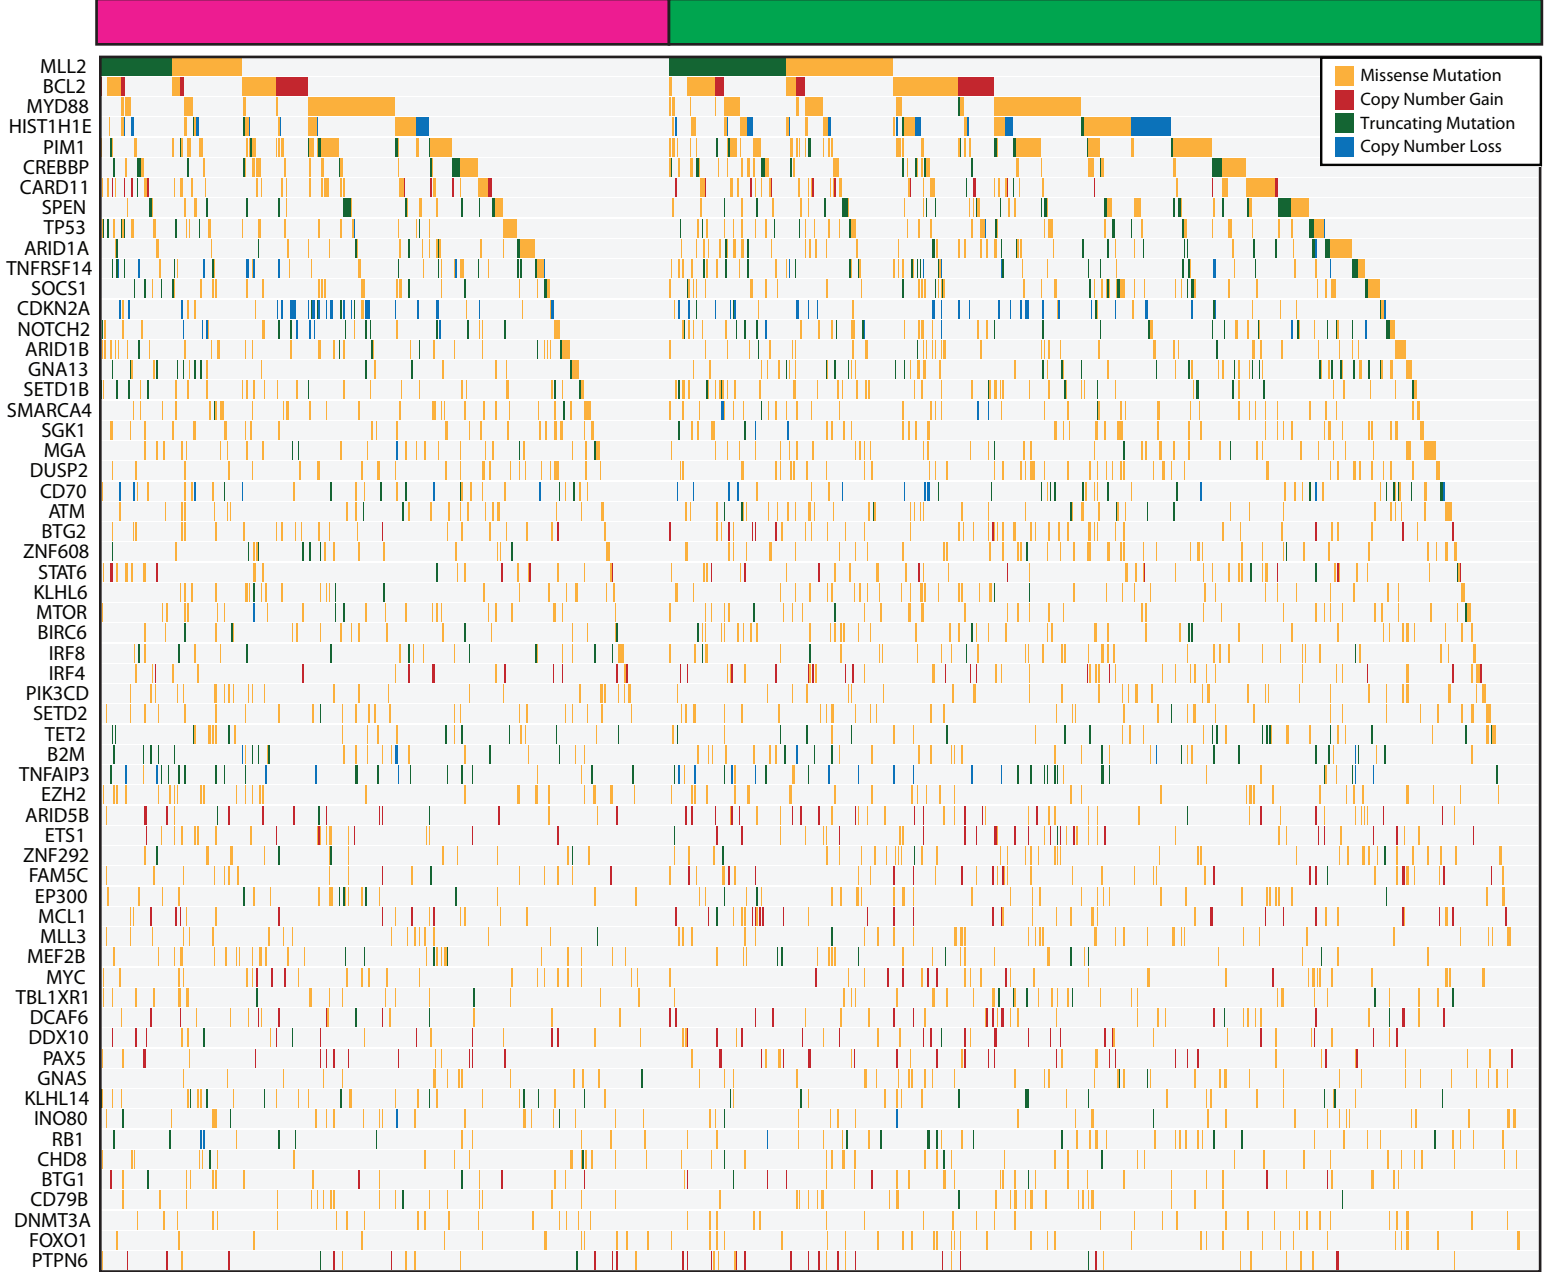**B**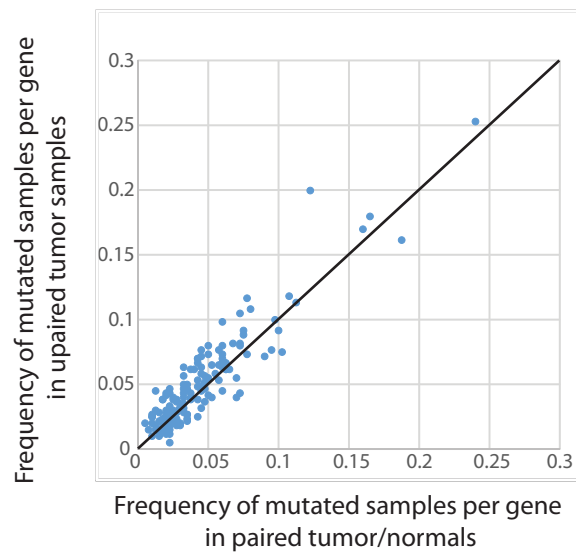

Supplement: NIHMS907791-supplement-2.pdf [file NIHMS907791-supplement-2.pdf]

**A**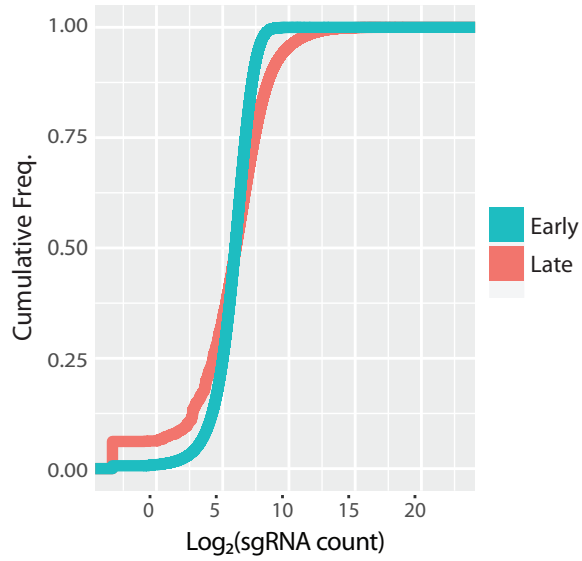**B**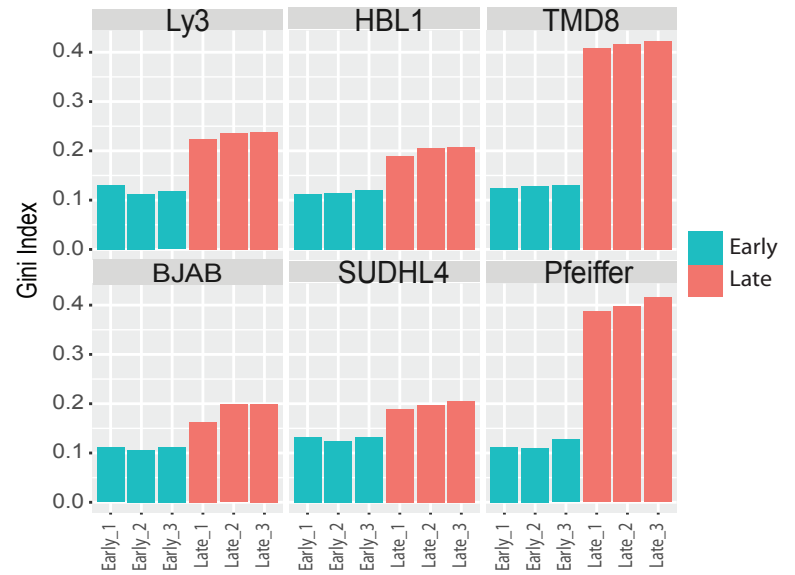**C**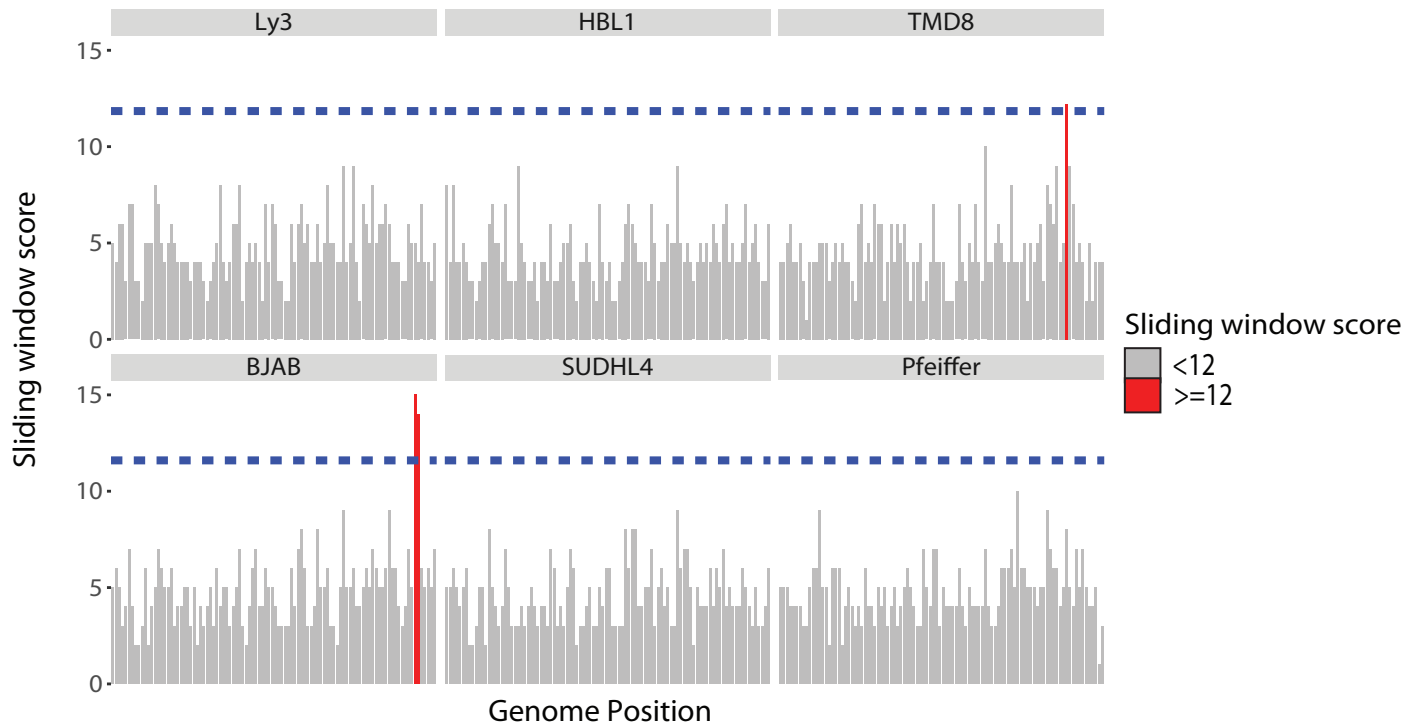**D**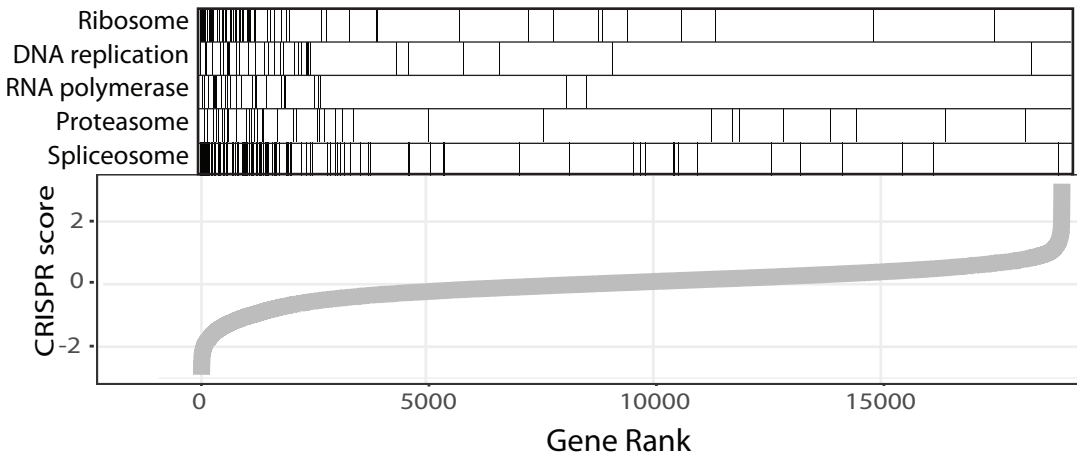

Supplement: NIHMS907791-supplement-3.pdf [file NIHMS907791-supplement-3.pdf]

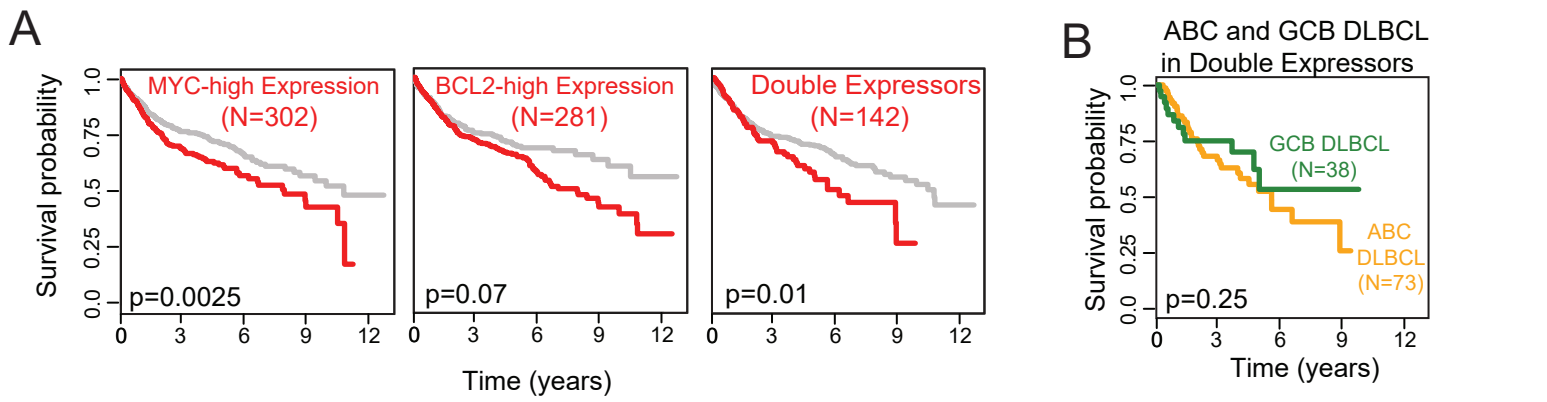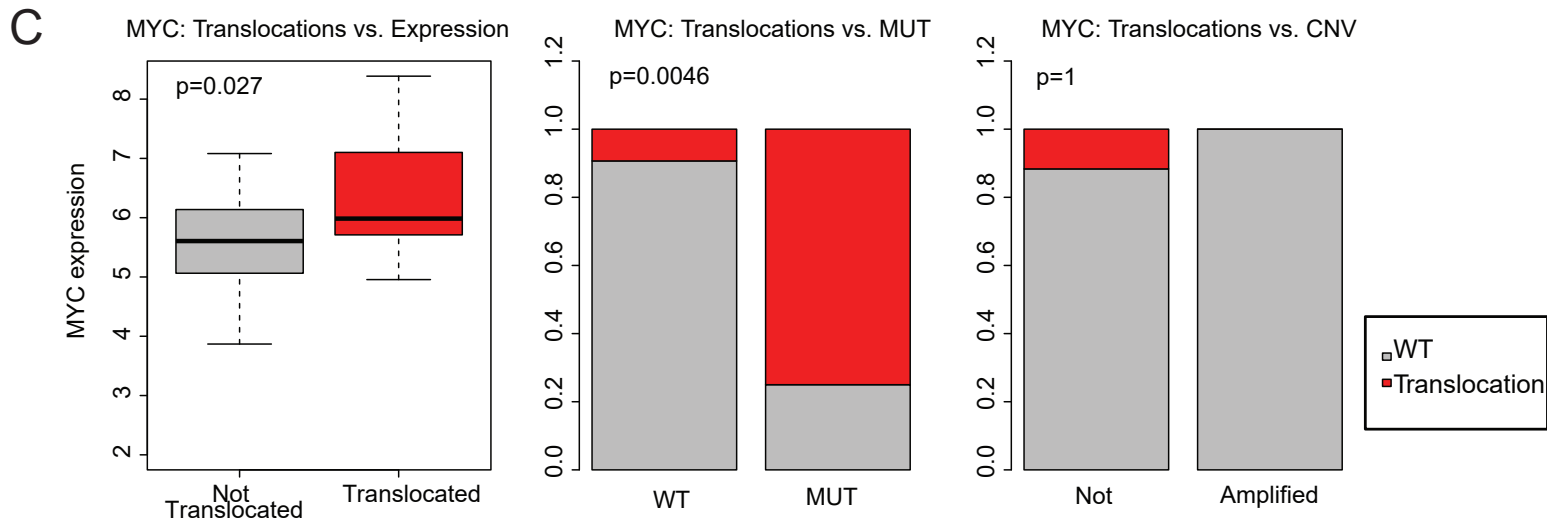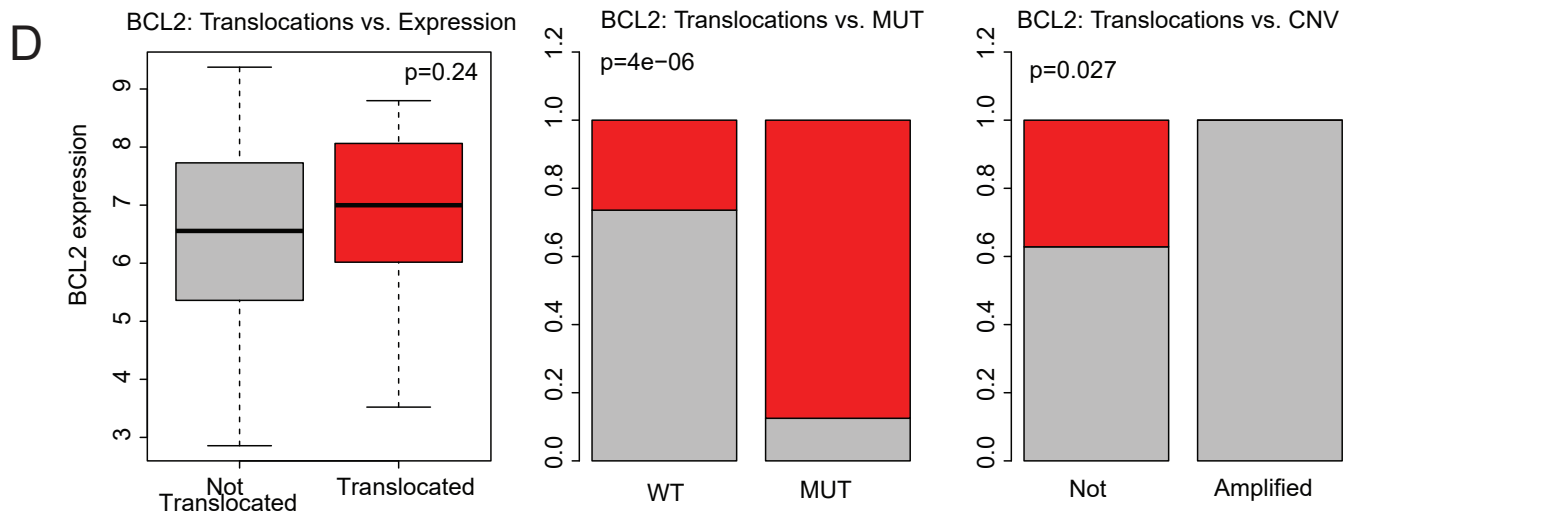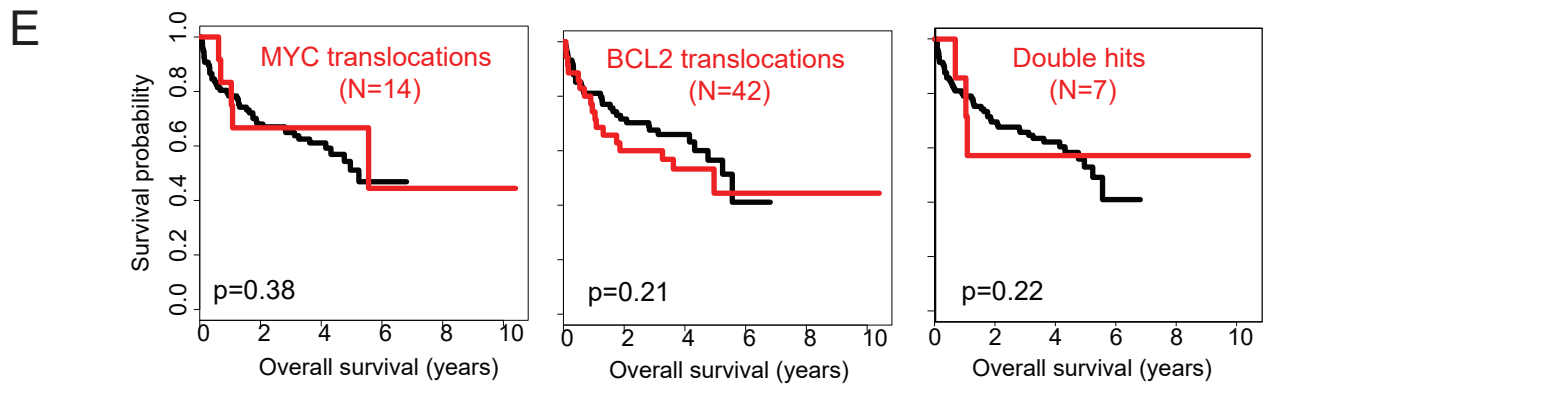

Supplement: NIHMS907791-supplement-4.pdf [file NIHMS907791-supplement-4.pdf]

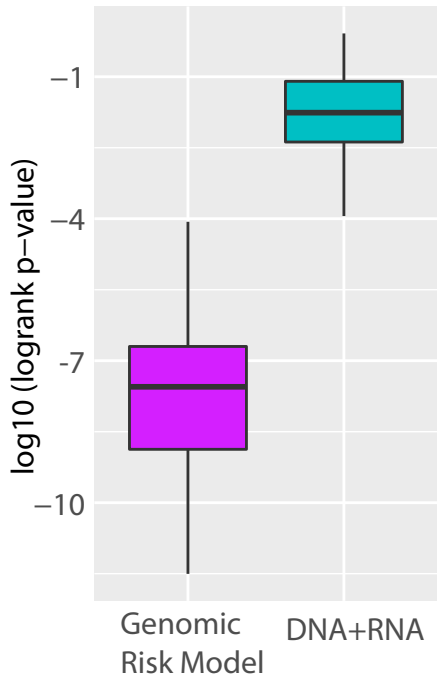

Supplement: NIHMS907791-supplement-5.pdf [file NIHMS907791-supplement-5.pdf]
